# Supplementary material for: Is Empowerment of Female Radiologists Still Needed? Findings of a Systematic Review
Source: MDPI journal article supplement (doi:10.3390/ijerph18041542), 2021-02-05
Supplement: s1 [file s1]

## **Supplementary Text S1. Search strategies and retrieved records from each electronic database**

### **1. PubMed**

Date of search: 21<sup>st</sup> of October 2020

Search strategy:

#1 (gender OR women)

#2 inequality

#3 radiology

#1 AND #2 AND #3

n findings: 268

### **2. Scopus**

Date of search: 21<sup>st</sup> of October 2020

Search strategy:

((gender OR women) AND (inequality) AND (radiology))

n findings: 1,898

### **3. Web of Science Core Collection**

Date of search: 21<sup>st</sup> of October 2020

Search strategy:

#1 TS=(gender OR women)

#2 TS=(inequality)

#3 TS=(radiology)

#4: #1 AND #2 AND #3

n findings: 5

**Supplementary Table S1. List of excluded studies**

| Study                                                                                                                                                                                                                                                                                                                                                                                 | Reason for exclusion                 |
|---------------------------------------------------------------------------------------------------------------------------------------------------------------------------------------------------------------------------------------------------------------------------------------------------------------------------------------------------------------------------------------|--------------------------------------|
| 1. Abdellatif, W.; Ding, J.; Jalal, S.; Chopra, S.; Butler, J.; Ali, I. T.; Shah, S.; Khosa, F. Leadership Gender Disparity Within Research-Intensive Medical Schools: A Transcontinental Thematic Analysis. <i>J Contin Educ Health Prof</i> <b>2019</b> , <i>39</i> , 243–250.                                                                                                      | Mismatch with the inclusion criteria |
| 2. Aldrich, M.C.; Cust, A.E.; Raynes-Greenow, C. International Network for Epidemiology in Policy. Gender equity in epidemiology: a policy brief. <i>Ann Epidemiol</i> <b>2019</b> , <i>35</i> , 1–3.                                                                                                                                                                                 | Mismatch with the inclusion criteria |
| 3. Anim-Sampong, S.; Arthur, L.; Nkansah, J. A.; Botwe, B. O. Women in Radiography Practice in Ghana: Motivating and Demotivating Factors. <i>Radiol Technol</i> <b>2018</b> , <i>89</i> , 337–343.                                                                                                                                                                                   | Full-text not available              |
| 4. Arleo, E. K.; Parikh, J. R.; Wolfman, D.; Gridley, D.; Bender, C.; Bluth, E. Utilization of the Family and Medical Leave Act in Radiology Practices According to the 2016 ACR Commission on Human Resources Workforce Survey. <i>J Am Coll Radiol</i> <b>2016</b> , <i>13</i> , 1440–1446.                                                                                         | Mismatch with the inclusion criteria |
| 5. Baerlocher, M.O.; Walker, M. Does gender impact upon application rejection rate among Canadian radiology residency applicants?. <i>Can Assoc Radiol J</i> <b>2005</b> , <i>56</i> , 232–237.                                                                                                                                                                                       | Full-text not available              |
| 6. Beeler, W.H.; Griffith, K.A.; Jones, R.D.; Chapman, C.H.; Holliday, E.B.; Lalani, N.; Wilson, E.; Bonner, J.A.; Formenti, S.C.; Hahn, S.M.; et al. Gender, Professional Experiences, and Personal Characteristics of Academic Radiation Oncology Chairs: Data to Inform the Pipeline for the 21st Century. <i>Int J Radiat Oncol Biol Phys</i> <b>2019</b> , <i>104</i> , 979–986. | Mismatch with the inclusion criteria |
| 7. Belinsky, S.B.; Blagg, J.D. Analyzing the glass ceiling effect among radiologic technologists. <i>Radiol Technol</i> <b>2011</b> , <i>82</i> , 300–310.                                                                                                                                                                                                                            | Full-text not available              |
| 8. Bendels, M.; Müller, R.; Brueggmann, D.; Groneberg, D.A. Gender disparities in high-quality research revealed by Nature Index journals. <i>PLoS One</i> <b>2018</b> , <i>13</i> , e0189136.                                                                                                                                                                                        | Mismatch with the inclusion criteria |
| 9. Bluth, E.I.; Cox, J.; Bansal, S.; Green, D. The 2015 ACR Commission on Human Resources Workforce Survey. <i>J Am Coll Radiol</i> <b>2015</b> , <i>12</i> , 1137–1141.                                                                                                                                                                                                              | Insufficient information             |
| 10. Boechat M.I. Women in pediatric radiology. <i>Pediatr Radiol</i> <b>2010</b> , <i>40</i> , 484–487.                                                                                                                                                                                                                                                                               | Mismatch with the inclusion criteria |
| 11. Bouchardy, J.; Testuz, A.; Blanche, C. Gender aspects in cardiac imaging. <i>Cardiovasc Med</i> <b>2019</b> , <i>22</i> , w02069.                                                                                                                                                                                                                                                 | Mismatch with the inclusion criteria |
| 12. Boulis A. The Evolution of Gender and Motherhood in Contemporary Medicine. <i>Ann Am Acad Pol Soc Sci</i> <b>2004</b> , <i>596</i> , 259–261.                                                                                                                                                                                                                                     | Mismatch with the inclusion criteria |
| 13. Branstetter, B. F4th.; Faix, L.E.; Humphrey, A.L.; Schumann, J.B. Preclinical medical student training in radiology: the effect of early exposure. <i>AJR Am J Roentgenol</i> <b>2007</b> , <i>188</i> , W9–W14.                                                                                                                                                                  | Mismatch with the inclusion criteria |
| 14. Bundy, B.D.; Bellemann, N.; Weber, M.A. Vereinbarkeit von Familie und ärztlichem Beruf [Compatibility of family and medical profession]. <i>Radiologe</i> <b>2011</b> , <i>51</i> , 801–803.                                                                                                                                                                                      | Mismatch with the inclusion criteria |
| 15. Campbell, J.C.; Yoon, S.C.; Grimm, L.J. Collaboration Metrics Among Female and Male Researchers: A 5-Year Review of Publications in Major Radiology Journals. <i>Acad Radiol</i> <b>2018</b> , <i>25</i> , 951–954.                                                                                                                                                               | Mismatch with the inclusion criteria |
| 16. Chan, H.F.; Torgler, B. Gender differences in performance of top cited scientists by field and country. <i>Scientometrics</i> <b>2020</b> , <i>125</i> , 2421–2447.                                                                                                                                                                                                               | Mismatch with the inclusion criteria |

|                                                                                                                                                                                                                                                                                                                                                                                         |                                      |
|-----------------------------------------------------------------------------------------------------------------------------------------------------------------------------------------------------------------------------------------------------------------------------------------------------------------------------------------------------------------------------------------|--------------------------------------|
| 17. Choi, M.; Fuller, C.D.; Thomas, C.R. Estimation of citation-based scholarly activity among radiation oncology faculty at domestic residency-training institutions: 1996-2007. <i>Int J Radiat Oncol Biol Phys</i> <b>2009</b> , <i>74</i> , 172–178.                                                                                                                                | Mismatch with the inclusion criteria |
| 18. Estrada-Ramírez, K.P.; Miranda-Lora, A.L.; Sandoval-Quiroa, R.C.; Ávila-Montiel, D.; Mier-Prado, M.J.; Garduño-Espinosa, J. Gender gap in the authorship of published articles in the Boletín Médico del Hospital Infantil de México. <i>Bol Med Hosp Infant Mex</i> <b>2018</b> , <i>75</i> , 216–223.                                                                             | Mismatch with the inclusion criteria |
| 19. Ekpo, E.U.; Snaith, B.; Harris, M.A.; McEntee, M.F. Doctoral profile of the medical radiation sciences: a baseline for Australia and New Zealand. <i>J Med Radiat Sci</i> <b>2017</b> , <i>64</i> , 195–202.                                                                                                                                                                        | Mismatch with the inclusion criteria |
| 20. Frandsen, T.F.; Jacobsen, R.H.; Ousager, J. Gender gaps in scientific performance: a longitudinal matching study of health sciences researchers. <i>Scientometrics</i> <b>2020</b> , <i>124</i> , 1511–1527.                                                                                                                                                                        | Mismatch with the inclusion criteria |
| 21. Giner-Soriano, M.; López-Pereiro, O.; Zabaleta-Del-Olmo, E.; Pons-Vigués, M.; Morros, R.; Gómez-Lumbreras, A. Análisis bibliométrico de la autoría femenina en artículos originales en la revista ATENCIÓN PRIMARIA [Bibliometric analysis of female authorship in original articles in the journal ATENCIÓN PRIMARIA]. <i>Aten Primaria</i> <b>2019</b> , S0212-6567(19), 30423–8. | Mismatch with the inclusion criteria |
| 22. Grimm, L.J.; Ngo, J.; Pisano, E.D.; Yoon, S. Men (and Women) in Academic Radiology: How Can We Reduce the Gender Discrepancy?. <i>AJR Am J Roentgenol</i> <b>2016</b> , <i>206</i> , 678–680.                                                                                                                                                                                       | Mismatch with the inclusion criteria |
| 23. Grimm, L.J.; Redmond, R.A.; Campbell, J. C.; Rosette, A. S. Gender and Racial Bias in Radiology Residency Letters of Recommendation. <i>J Am Coll Radiol</i> . <b>2020</b> , <i>17</i> , 64–71.                                                                                                                                                                                     | Mismatch with the inclusion criteria |
| 24. Grissom, N.M.; Reyes, T.M. Let's call the whole thing off: evaluating gender and sex differences in executive function. <i>Neuropsychopharmacology</i> <b>2019</b> , <i>44</i> , 86–96.                                                                                                                                                                                             | Mismatch with the inclusion criteria |
| 25. Guss, Z.D.; Chen, Q.; Hu, C.; Guss, L.G.; DeWeese, T.L.; Terezakis, S. A. (2019). Differences in Physician Compensation Between Men and Women at United States Public Academic Radiation Oncology Departments. <i>Int J Radiat Oncol Biol Phys</i> <b>2019</b> , <i>103</i> , 314–319.                                                                                              | Mismatch with the inclusion criteria |
| 26. Hamberg K. Gender bias in medicine. <i>Womens Health (Lond)</i> <b>2008</b> , <i>4</i> , 237–243.                                                                                                                                                                                                                                                                                   | Mismatch with the inclusion criteria |
| 27. Hamid, S.; Ali Inam, S.H.; Jamil, H.; Zeb, R. Speciality preference with respect to gender among medical students of Pakistan. <i>J Pak Med Assoc</i> <b>2019</b> , <i>69</i> , 1190–1193.                                                                                                                                                                                          | Mismatch with the inclusion criteria |
| 28. Hamidzadeh, R.; Jalal, S.; Pindiprolu, B.; Tiwana, M.H.; Macura, K.J.; Qamar, S.R.; Nicolaou, S.; Khosa, F. Influences for Gender Disparity in the Radiology Societies in North America. <i>AJR Am J Roentgenol</i> <b>2018</b> , <i>211</i> , 831–838.                                                                                                                             | Insufficient information             |
| 29. Harrington, S.G.; Harvey, H.B. Quality Improvement and Reimbursements: An Opportunity to Address Health Disparities in Radiology. <i>J Am Coll Radiol</i> <b>2019</b> , <i>16</i> , 635–637.                                                                                                                                                                                        | Mismatch with the inclusion criteria |
| 30. Heiligers, P.J.; de Jong, J.D.; Groenewegen, P.P.; Hingstman, L.; Völker, B.; Spreeuwenberg, P. Is networking different with doctors working part-time? Differences in social networks of part-time and full-time doctors. <i>BMC Health Serv Res</i> <b>2008</b> , <i>8</i> , 204.                                                                                                 | Mismatch with the inclusion criteria |
| 31. Hinze, S.W. Inside Medical Marriages: The Effect of Gender on Income. <i>Work and Occupations</i> <b>2000</b> , <i>27</i> , 464–99.                                                                                                                                                                                                                                                 | Mismatch with the inclusion criteria |
| 32. Holliday, E.B.; Jaggi, R.; Wilson, L.D.; Choi, M.; Thomas, C.R.; Fuller, C.D. Gender differences in publication productivity,                                                                                                                                                                                                                                                       | Mismatch with the inclusion criteria |

|                                                                                                                                                                                                                                                                                                                                  |                                      |
|----------------------------------------------------------------------------------------------------------------------------------------------------------------------------------------------------------------------------------------------------------------------------------------------------------------------------------|--------------------------------------|
| academic position, career duration, and funding among U.S. academic radiation oncology faculty. <i>Acad Med</i> <b>2014</b> , <i>89</i> , 767–773.                                                                                                                                                                               |                                      |
| 33. Ibn Auf, A.; Awadalla, H.; Ahmed, M. E.; Ahmed, M. H. Comparing the participation of men and women in academic medicine in medical colleges in Sudan: A cross-sectional survey. <i>J Educ Health Promot</i> <b>2019</b> , <i>8</i> , 31.                                                                                     | Mismatch with the inclusion criteria |
| 34. Jalilianhasanpour, R.; Chen, H.; Caffo, B.; Johnson, P.; Beheshtian, E.; Yousem, D.M. Are Women Disadvantaged in Academic Radiology? <i>Acad Radiol</i> <b>2020</b> , <i>27</i> , 1760–1766.                                                                                                                                 | Full-text not available              |
| 35. Jutras, M.; Malekafzali, L.; Jung, S.; Das, P.; Qamar, S.R.; Khosa, F. National Institutes of Health: Gender Differences in Radiology Funding. <i>Acad Radiol</i> <b>2020</b> , <i>S1076-6332(20)</i> , 30482–7.                                                                                                             | Full-text not available              |
| 36. Kalaitzi, S.; Czabanowska, K.; Fowler-Davis, S.; Brand, H. Women leadership barriers in healthcare, academia and business. <i>Equality, Diversity and Inclusion</i> <b>2017</b> , <i>36</i> , 457-474.                                                                                                                       | Mismatch with the inclusion criteria |
| 37. Madsen, L.B.; Kalantarova, S.; Jindal R.; Akerman, M.; Fefferman, N.R.; Hoffmann, J.C. National survey to assess gender, racial, and ethnic differences among radiology residency applicants regarding factors impacting program selection. <i>Acad Radiol</i> (in press).                                                   | Full-text not available              |
| 38. Martin, C. A.; Woodring, J. H. Attitudes toward women in radiology. <i>J Am Med Womens Assoc</i> <b>1972</b> , <i>41</i> , 50–53.                                                                                                                                                                                            | Full-text not available              |
| 39. McClelland, S.; Holland, K.J. You, Me, or Her: Leaders' Perceptions of Responsibility for Increasing Gender Diversity in STEM Departments. <i>Psychology of Women Quarterly</i> <b>2014</b> , <i>39</i> , 210–225.                                                                                                           | Mismatch with the inclusion criteria |
| 40. Moghimi, S.; Khurshid, K.; Jalal, S.; Qamar, S.R.; Nicolaou, S.; Fatima, K.; Khosa, F. Gender Differences in Leadership Positions Among Academic Nuclear Medicine Specialists in Canada and the United States. <i>AJR Am J Roentgenol</i> <b>2019</b> , <i>212</i> , 146–150.                                                | Mismatch with the inclusion criteria |
| 41. Morris, E.; Kubik-Huch, R.A.; Abdel-Wahab, M.; Balogun, E.; Beardmore, C.; Beets-Tan, R.; Boyd-Thorpe, A.; Derchi, L.; Fuchsjaeger, M.; Husband, J.; Jackson, V.; et al. Women in focus: advice from the front lines on how to enable well-being and build resilience. <i>Insights Imaging</i> <b>2020</b> , <i>11</i> , 55. | Mismatch with the inclusion criteria |
| 42. Obodovskiy, I. <i>Radiation: Fundamentals, Applications, Risks, and Safety</i> ; Publisher: Elsevier, Netherlands, 2019.                                                                                                                                                                                                     | Mismatch with the inclusion criteria |
| 43. Osborn, V.W.; Doke, K.; Griffith, K.A.; Jones, R.; Lee, A.; Maquilan, G.; Masters, A.H.; Albert, A.A.; Dover, L.L.; Puckett, L.L.; et al. A Survey Study of Female Radiation Oncology Residents' Experiences to Inform Change. <i>Int J Radiat Oncol Biol Phys</i> <b>2019</b> , <i>104</i> , 999–1008.                      | Mismatch with the inclusion criteria |
| 44. Perez, Y.V.; Kesselman, A.; Abbey-Mensah, G.; Walsh, J. A Glance at Gender-Specific Preferences Influencing Interventional Radiology Selection. <i>J Vasc Interv Radiol</i> <b>2016</b> , <i>27</i> , 142–143.e1.                                                                                                            | Mismatch with the inclusion criteria |
| 45. Pfliederer, B.; Bortul, M.; Palmisano, S.; Rodde, S.; Hasebrook, J. Improving female physician's careers in academic medicine: chances and challenges. <i>Best Pract Res Clin Anaesthesiol</i> <b>2018</b> , <i>32</i> , 15–23.                                                                                              | Mismatch with the inclusion criteria |
| 46. Rodrigues, J.J. <i>Advancing Medical Practice through Technology: Applications for Healthcare Delivery, Management, and Quality</i> . Publisher: IGI Global, USA, 2013.                                                                                                                                                      | Mismatch with the inclusion criteria |

|                                                                                                                                                                                                                                              |                                      |
|----------------------------------------------------------------------------------------------------------------------------------------------------------------------------------------------------------------------------------------------|--------------------------------------|
| 47. Rosen, M.P.; Davis, R.B.; Lesky, L.G. Utilization of outpatient diagnostic imaging. Does the physician's gender play a role?. <i>J Gen Intern Med</i> <b>1997</b> , <i>12</i> , 407–411.                                                 | Mismatch with the inclusion criteria |
| 48. Safdar, B.; Greenberg, M.R. Applying the gender lens to emergency care: from bench to bedside. <i>Acad Emerg Med</i> <b>2014</b> , <i>21</i> , 1325–1328.                                                                                | Mismatch with the inclusion criteria |
| 49. Sepulveda, K.A., Paladin, A.M., Rawson, J.V. Gender Diversity in Academic Radiology Departments: Barriers and Best Practices to Optimizing Inclusion and Developing Women Leaders. <i>Acad Radiol</i> <b>2018</b> , <i>25</i> , 556–560. | Mismatch with the inclusion criteria |
| 50. Spalluto, L.B.; Arleo, E.K.; Lewis, M.C.; Oates, M.E.; Macura, K.J. Addressing Needs of Women Radiologists: Opportunities for Practice Leaders to Facilitate Change. <i>Radiographics</i> <b>2018</b> , <i>38</i> , 1626–1637.           | Mismatch with the inclusion criteria |
| 51. Strax, R. Diversity Committee: A Means to Local Gender Equity. <i>J Am Coll Radiol</i> <b>2019</b> , <i>16</i> , 407.                                                                                                                    | Mismatch with the inclusion criteria |
| 52. Vosper M.R.; Price R.C.; Ashmore L.A. Careers and destinations of radiography students from the University of Hertfordshire. <i>Radiography</i> <b>2005</b> , <i>11</i> , 79-88.                                                         | Mismatch with the inclusion criteria |
| 53. Webb, E.M.; Bucknor, M.D.; Naeger, D.M. Diversity and Inclusion: Now Radiology Must Walk the Walk. <i>J Am Coll Radiol</i> <b>2018</b> , <i>15</i> , 687–688.                                                                            | Mismatch with the inclusion criteria |
| 54. Weigel, K.S.; Kubik-Huch, R.A.; Gebhard, C. Women in radiology: why is the pipeline still leaking and how can we plug it? <i>Acta Radiol</i> <b>2020</b> , <i>61</i> , 743–748.                                                          | Mismatch with the inclusion criteria |

**Supplementary Table S2. Quality appraisal of the included studies****MMAT Tool****Qualitative Studies**

|                          | 1. Is the qualitative approach appropriate to answer the research question? | 2. Are the qualitative data collection methods adequate to address the research question? | 3. Are the findings adequately derived from the data? | 4. Is the interpretation of results sufficiently substantiated by data? | 5. Is there coherence between qualitative data sources, collection analysis, and interpretation? |
|--------------------------|-----------------------------------------------------------------------------|-------------------------------------------------------------------------------------------|-------------------------------------------------------|-------------------------------------------------------------------------|--------------------------------------------------------------------------------------------------|
| Piltch-Loeb et al., 2020 | ✓                                                                           | ✓                                                                                         | ✓                                                     | ✓                                                                       | ✓                                                                                                |

**Quantitative descriptive studies**

|                                | 1. Is the sampling strategy relevant to address the research question? | 2. Is the sample representative of the target population? | 3. Are the measurements appropriate? | 4. Is the risk of nonresponse bias low? (for case series and case report: are there complete data on the cases?) | 5. Is the statistical analysis appropriate to answer the research question? |
|--------------------------------|------------------------------------------------------------------------|-----------------------------------------------------------|--------------------------------------|------------------------------------------------------------------------------------------------------------------|-----------------------------------------------------------------------------|
| Abdellatif et al., 2019        | ✓                                                                      | ✓                                                         | ✓                                    | NA                                                                                                               | ✓                                                                           |
| Abduljabbar et al., 2020       | ✓                                                                      | ✓                                                         | ✓                                    | ✓                                                                                                                | ✓                                                                           |
| Ahmadi et al., 2017            | ✓                                                                      | ✓                                                         | ✓                                    | NA                                                                                                               | X                                                                           |
| Arleo et al., 2016             | ✓                                                                      | ✓                                                         | ✓                                    | X                                                                                                                | X                                                                           |
| Baker et al., 2006             | ✓                                                                      | ✓                                                         | ✓                                    | NA                                                                                                               | X                                                                           |
| Battaglia et al., 2018         | ✓                                                                      | ✓                                                         | ✓                                    | NA                                                                                                               | ✓                                                                           |
| Bernhard et al., 2020          | ✓                                                                      | ✓                                                         | ✓                                    | NA                                                                                                               | ✓                                                                           |
| Bluth et al., 2015             | ✓                                                                      | ✓                                                         | X                                    | X                                                                                                                | X                                                                           |
| Buddeberg-Fischer et al., 2012 | ✓                                                                      | ✓                                                         | ✓                                    | X                                                                                                                | ✓                                                                           |
| Campbell et al., 2017          | ✓                                                                      | ✓                                                         | ✓                                    | NA                                                                                                               | ✓                                                                           |
| Campbell et al., 2018          | ✓                                                                      | ✓                                                         | ✓                                    | NA                                                                                                               | ✓                                                                           |
| Cater et al., 2018             | ✓                                                                      | ✓                                                         | ✓                                    | NA                                                                                                               | ✓                                                                           |
| Chapman et al., 2014           | ✓                                                                      | ✓                                                         | ✓                                    | NA                                                                                                               | ✓                                                                           |
| Chertoff et al., 2001          | ✓                                                                      | ✓                                                         | ✓                                    | ✓                                                                                                                | ✓                                                                           |
| Daldrup-Link et al., 2019      | ✓                                                                      | ✓                                                         | ✓                                    | ✓                                                                                                                | ✓                                                                           |
| Deipolyi et al., 2020          | ✓                                                                      | ✓                                                         | ✓                                    | NA                                                                                                               | ✓                                                                           |
| Deitch et al., 1998            | ✓                                                                      | ✓                                                         | ✓                                    | ✓                                                                                                                | ✓                                                                           |
| Dial et al., 1989              | ✓                                                                      | ✓                                                         | ✓                                    | NA                                                                                                               | X                                                                           |
| Donovan 2010                   | ✓                                                                      | ✓                                                         | ✓                                    | ✓                                                                                                                | ✓                                                                           |
| Duc et al., 2020               | ✓                                                                      | ✓                                                         | ✓                                    | NA                                                                                                               | ✓                                                                           |
| Fielding et al., 2007          | ✓                                                                      | ?                                                         | ✓                                    | ✓                                                                                                                | X                                                                           |
| Foo et al., 2020               | ✓                                                                      | ✓                                                         | ✓                                    | X                                                                                                                | ✓                                                                           |
| Frank et al., 1999             | ✓                                                                      | ✓                                                         | ✓                                    | NA                                                                                                               | X                                                                           |
| Grimm et al., 2017             | ✓                                                                      | ✓                                                         | ✓                                    | X                                                                                                                | ✓                                                                           |
| Hewett et al., 2016            | ✓                                                                      | ✓                                                         | ✓                                    | NA                                                                                                               | ✓                                                                           |

Fichera\*, Busch\*, Rimondini, Motta, Giraudo.

Is Empowerment of Female Radiologists Still Needed? Findings of a Systematic Review.

(\*These authors equally contributed and should be considered as co-first authors)

|                             |   |   |   |    |   |
|-----------------------------|---|---|---|----|---|
| Joshi et al., 2020          | ✓ | ✓ | ✓ | NA | ✓ |
| Kapoor et al., 2016         | ✓ | ✓ | ✓ | NA | ✓ |
| Kapoor et al., 2017         | ✓ | ✓ | ✓ | NA | ✓ |
| Kurshid et al., 2018        | ✓ | ✓ | ✓ | NA | ✓ |
| Lewis et al., 2007          | ✓ | ✓ | ✓ | ✓  | ✓ |
| Li et al., 2020             | ✓ | ? | ? | NA | X |
| Liang et al., 2015          | ✓ | ✓ | ✓ | NA | ✓ |
| Maddu et al., 2020          | ✓ | ✓ | ✓ | NA | ✓ |
| Magnavita et al., 2013      | ✓ | ? | ✓ | ?  | ✓ |
| McDonald et al., 2017       | ✓ | ✓ | ✓ | NA | ✓ |
| O'Connor et al., 2018       | ✓ | ✓ | ✓ | NA | ✓ |
| O'Neill et al., 2019        | ✓ | ✓ | ✓ | NA | ✓ |
| Owen et al., 1995           | ✓ | ✓ | ✓ | ✓  | ✓ |
| Piper et al., 2016          | ✓ | ✓ | ✓ | NA | ✓ |
| Piper et al., 2018          | ✓ | ✓ | ✓ | NA | ✓ |
| Pyatigorskaya et al., 2017  | ✓ | ✓ | ✓ | ✓  | ✓ |
| Pyatrigorskaya et al., 2017 | ✓ | ✓ | ✓ | NA | ✓ |
| Qamar et al., 2020          | ✓ | ✓ | ✓ | NA | ✓ |
| Qamar et al., 2018          | ✓ | ✓ | ✓ | NA | ✓ |
| Rosenkrantz et al., 2018    | ✓ | ✓ | ✓ | NA | ✓ |
| Rosenkrantz et al., 2019    | ✓ | ✓ | ✓ | NA | ✓ |
| Roubidoux et al., 2009      | ✓ | ✓ | ✓ | X  | ✓ |
| Sadigh et al., 2019         | ✓ | ✓ | ✓ | NA | ✓ |
| Shah et al., 2007           | ✓ | ✓ | ✓ | X  | ✓ |
| Vernuccio et al., 2019      | ✓ | ✓ | ✓ | ?  | ✓ |
| Vydareny et al., 2000       | ✓ | ✓ | ✓ | ?  | ✓ |
| Wah & Belli, 2018           | ✓ | ✓ | ✓ | X  | X |
| Wang et al., 2018           | ✓ | ✓ | ✓ | NA | ✓ |
| West & Nguyen, 2016         | ✓ | ✓ | ✓ | NA | ✓ |
| Whitley et al., 1987        | ✓ | ✓ | ✓ | ?  | ✓ |
| Xiao et al., 2018           | ✓ | ✓ | ✓ | NA | ✓ |
| Yun et al., 2015            | ✓ | ✓ | ✓ | NA | ✓ |
| Zener et al., 2016          | ✓ | ✓ | ✓ | X  | ✓ |
| Zulfiqar et al., 2020       | ✓ | ✓ | ✓ | NA | ✓ |

Fichera\*, Busch\*, Rimondini, Motta, Giraudo.

Is Empowerment of Female Radiologists Still Needed? Findings of a Systematic Review.

(\*These authors equally contributed and should be considered as co-first authors)

**Mixed methods studies**

|                        | 1. Is there an adequate rationale for using a mixed methods design to address the research question? | 2. Are the different components of the study effectively integrated to answer the research questions? | 3. Are the outputs of the integration of qualitative and quantitative components adequately interpreted? | 4. Are divergences and inconsistencies between quantitative and qualitative results adequately addressed? | 5. Do the different components of the study adhere to the quality criteria of each tradition of the methods involved? |
|------------------------|------------------------------------------------------------------------------------------------------|-------------------------------------------------------------------------------------------------------|----------------------------------------------------------------------------------------------------------|-----------------------------------------------------------------------------------------------------------|-----------------------------------------------------------------------------------------------------------------------|
| Englander et al., 2018 | ✓                                                                                                    | ✓                                                                                                     | ✓                                                                                                        | ✓                                                                                                         | X                                                                                                                     |

✓= Yes; X= No; ? = Can't tell ; NA = not applicable
